# Supplementary material
Source: MDPI journal article supplement (https://www.mdpi.com/2073-4441/14/21/3431)
Supplement: s1 [file s1]

# Supplementary Material

m/z=216.1006

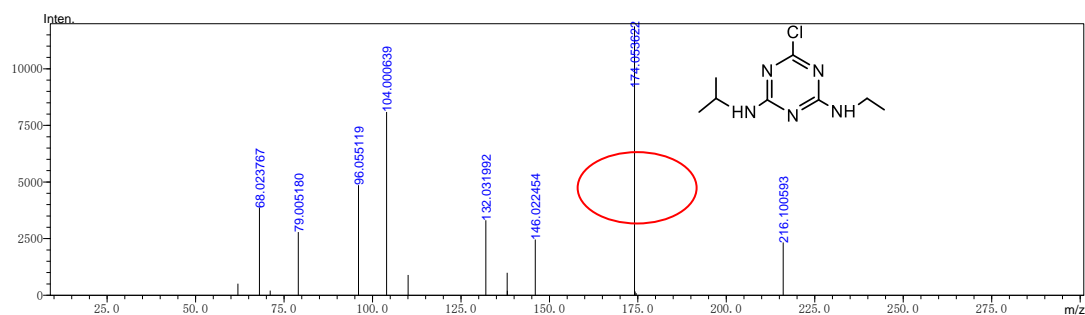

m/z=232.0771

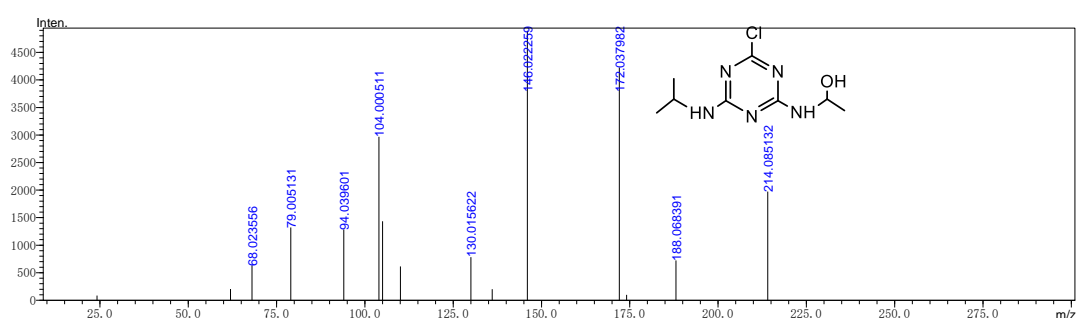

m/z=174.0540

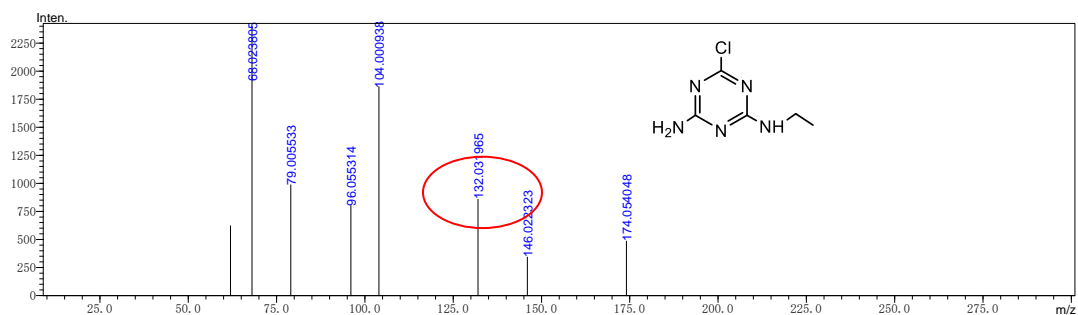

m/z=188.0689

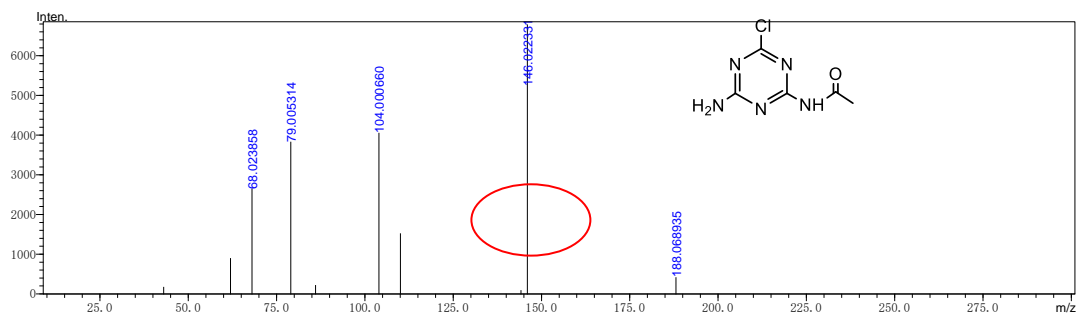

m/z=230.0800

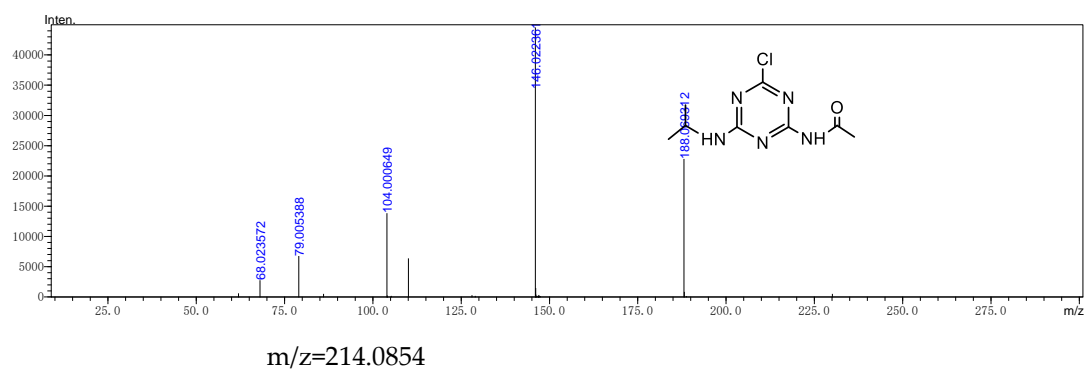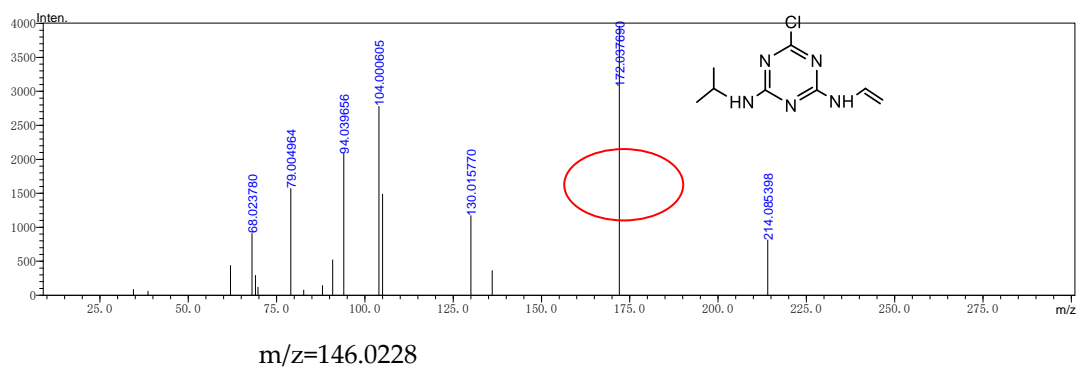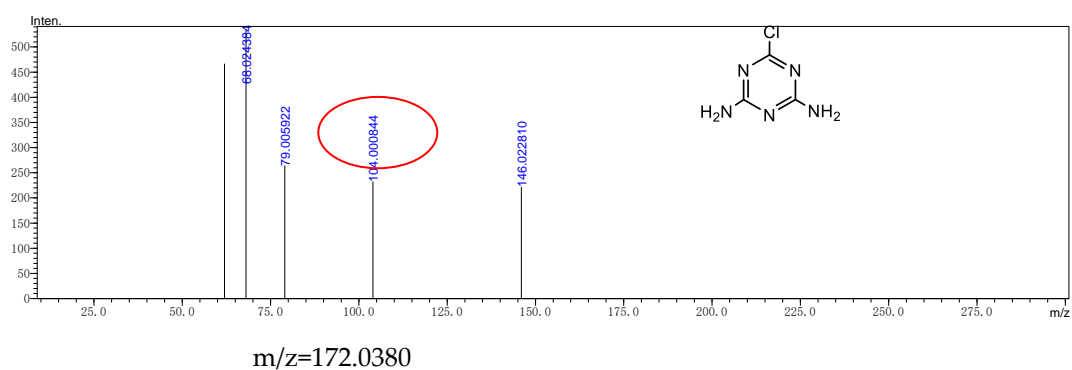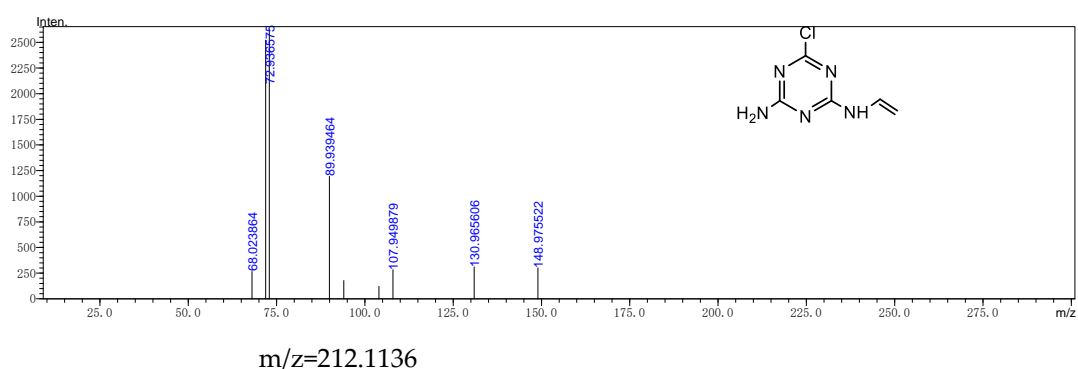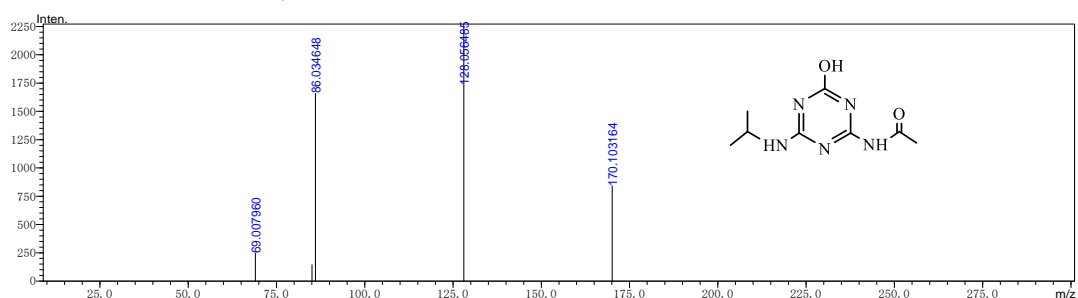

Figure S1. HPLC-MS/MS chromatogram of atrazine and intermediates.

**Table S1.** Physical properties of the catalysts.

| Catalysts                      | BET Surface Area (m <sup>2</sup> g <sup>-1</sup> ) | Pore Volume (cm <sup>3</sup> g <sup>-1</sup> ) | Pore Size (nm) |
|--------------------------------|----------------------------------------------------|------------------------------------------------|----------------|
| CeO <sub>2</sub> (synthetical) | 95.08                                              | 0.24                                           | 10.3           |
| CeO <sub>2</sub> (commercial)  | 1.44                                               | 0.0088                                         | -              |
| CeO <sub>2</sub> nanorods [1]  | 109.40                                             | 0.22                                           | 7.88           |
| CeO <sub>2</sub> [2]           | 153.8                                              | 0.47                                           | 3.43           |
| MnO <sub>2</sub> [3]           | 100                                                | 0.26                                           | 10.3           |

**Table S2.** Energy positions of Ce spin orbit components in different samples (unit: eV).

|             | Ce 3d <sub>3/2</sub> |        |         |        |        | Ce 3d <sub>5/2</sub> |        |         |        |        | %       |        |
|-------------|----------------------|--------|---------|--------|--------|----------------------|--------|---------|--------|--------|---------|--------|
|             | v <sub>0</sub>       | v      | v'      | v''    | v'''   | u <sub>0</sub>       | u      | u'      | u''    | u'''   |         |        |
|             | Ce(III)              | Ce(IV) | Ce(III) | Ce(IV) | Ce(IV) | Ce(III)              | Ce(IV) | Ce(III) | Ce(IV) | Ce(IV) | Ce(III) | Ce(IV) |
| Commercial  | 880.20               | 882.29 | 884.36  | 888.76 | 898.09 | 898.83               | 900.89 | 902.59  | 907.43 | 916.63 | 11.18   | 88.82  |
| Synthetical | 880.38               | 882.46 | 884.84  | 888.87 | 898.18 | 898.38               | 900.98 | 903.05  | 907.61 | 916.83 | 9.21    | 90.79  |

**Table S3.** UPLC-MS/MS analysis of atrazine and intermediates.

| Compound | m/z      | Molecular Formula                                            | Structure |
|----------|----------|--------------------------------------------------------------|-----------|
| ATZ      | 216.1006 | C <sub>8</sub> H <sub>14</sub> ClN <sub>5</sub>              |           |
| P1       | 232.0711 | C <sub>8</sub> H <sub>14</sub> ClN <sub>5</sub> O            |           |
| P2       | 174.0540 | C <sub>5</sub> H <sub>8</sub> ClN <sub>5</sub>               |           |
| P3       | 214.0854 | C <sub>8</sub> H <sub>12</sub> ClN <sub>5</sub>              |           |
| P4       | 230.0800 | C <sub>8</sub> H <sub>12</sub> ClN <sub>5</sub> O            |           |
| P5       | 172.0380 | C <sub>5</sub> H <sub>6</sub> ClN <sub>5</sub>               |           |
| P6       | 212.1136 | C <sub>8</sub> H <sub>13</sub> N <sub>5</sub> O <sub>2</sub> |           |

|    |          |                                                  |                                                                                     |
|----|----------|--------------------------------------------------|-------------------------------------------------------------------------------------|
| P7 | 188.0689 | C <sub>5</sub> H <sub>6</sub> ClN <sub>5</sub> O | 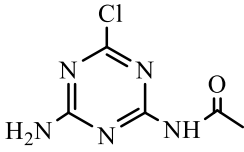 |
| P8 | 146.0228 | C <sub>3</sub> H <sub>4</sub> ClN <sub>5</sub>   |  |

## References

1. Qiu, X.H.; Su, X.Y.; Li, X.J.; Li, N. Preparation of CeO<sub>2</sub> with Different Morphologies and Its Application to Catalytic Ozonation of Aqueous Lemon Yellow Solutions. *Adv. Mater. Res.* **2014**, *997*, 3–8, <https://doi.org/10.4028/www.scientific.net/amr.997.3>.
2. Afzal, S.; Quan, X.; Lu, S. Catalytic performance and an insight into the mechanism of CeO<sub>2</sub> nanocrystals with different exposed facets in catalytic ozonation of p-nitrophenol. *Appl. Catal. B Environ.* **2019**, *248*, 526–537.
3. Zhang, J.; Zhuang, T.; Liu, S.; Zhang, G.C.; Huo, K. Catalytic ozonation of phenol enhanced by mesoporous MnO<sub>2</sub> prepared through nanocasting method with SBA-15 as template. *J. Environ. Chem. Eng.* **2020**, *8*, 103967.
